# Supplementary material
Source: publisher figshare collection journal article supplement (https://springernature.figshare.com/ndownloader/files/21664341)
Supplement: Supplementary file 1 [file 21664341]

**Additional file 2:** Data, 2D model responses and sensitivity tests

A) Apparent resistivity and phase of the sites for the Torrecilla profile (except for sites 1, 11 and 15, shown in the main document), after a 45° rotation, and the smoothed curves, that were used for the 2D inversion.

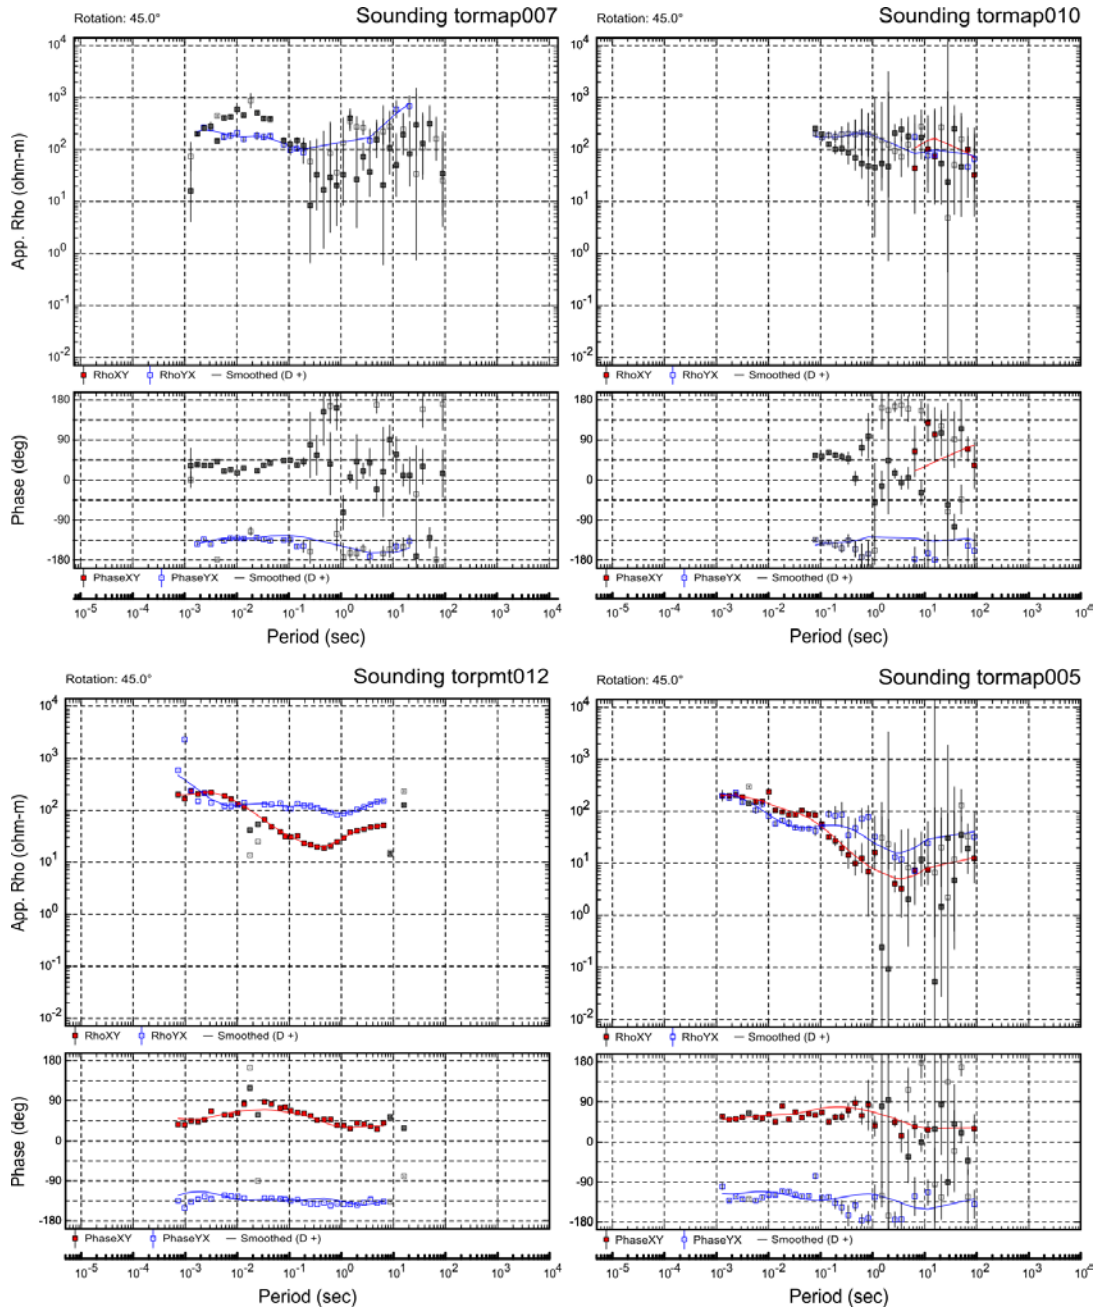

**Figure S2-1a:** Apparent resistivity and phases of the original data rotated 45° (symbols) and smoothed curves after applying D+ (solid lines) for sites 7, 10, 12 and 5. Red and blue symbols were the ones used to apply the smoothing. Grey symbols correspond to frequencies that were deactivated.

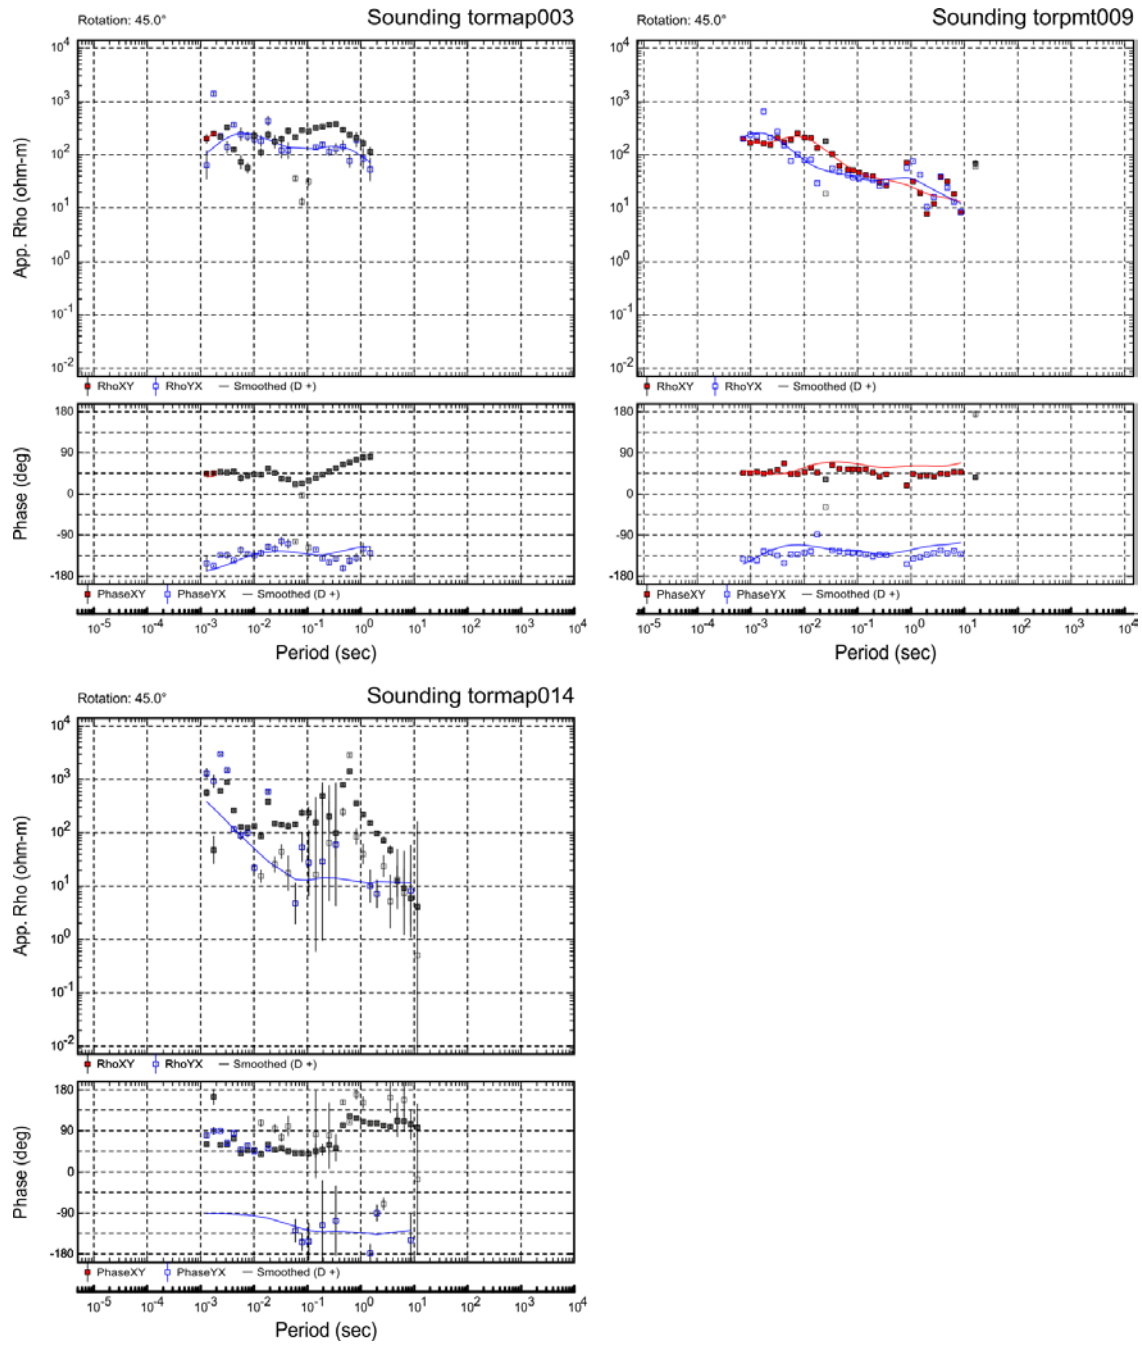

**Figure S2-1b:** Apparent resistivity and phases of the original data rotated 45° (symbols) and smoothed curves after applying D+ (solid lines) for sites 3, 9 and 14. Red and blue symbols were the ones used to apply the smoothing. Grey symbols correspond to frequencies that were deactivated.

B) Data and model responses from the 2D model of La Torrecilla (except for sites 1,

11 and 15, shown in the main document).

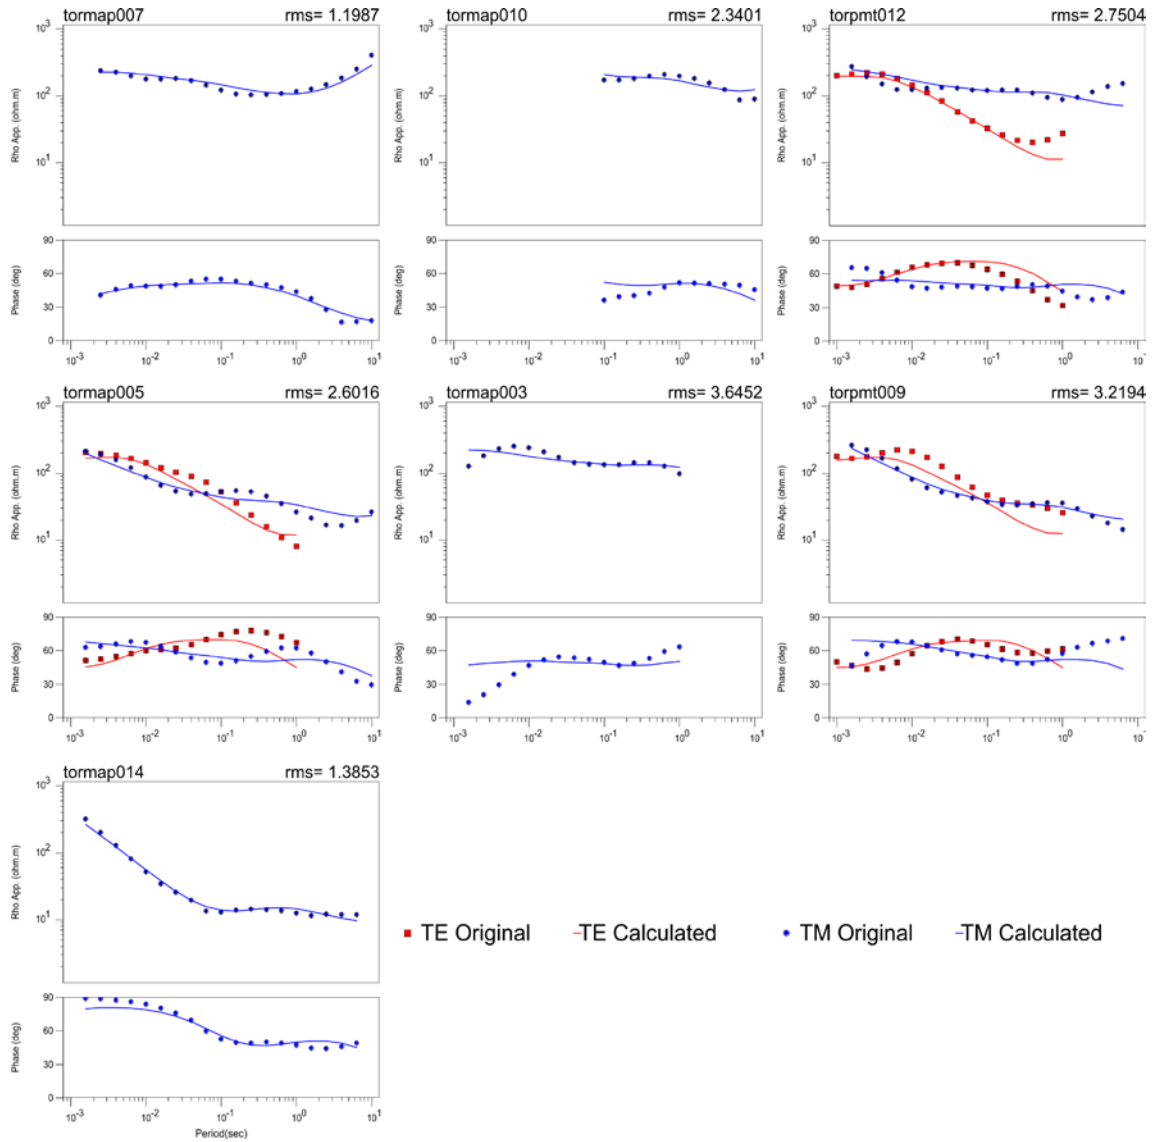

**Figure S2-2:** TE and TM smoothed apparent resistivities and phases, and the 2D model responses.

C) Sensitivity tests of features “Upper C-R” and “C1” identified in the 2D model

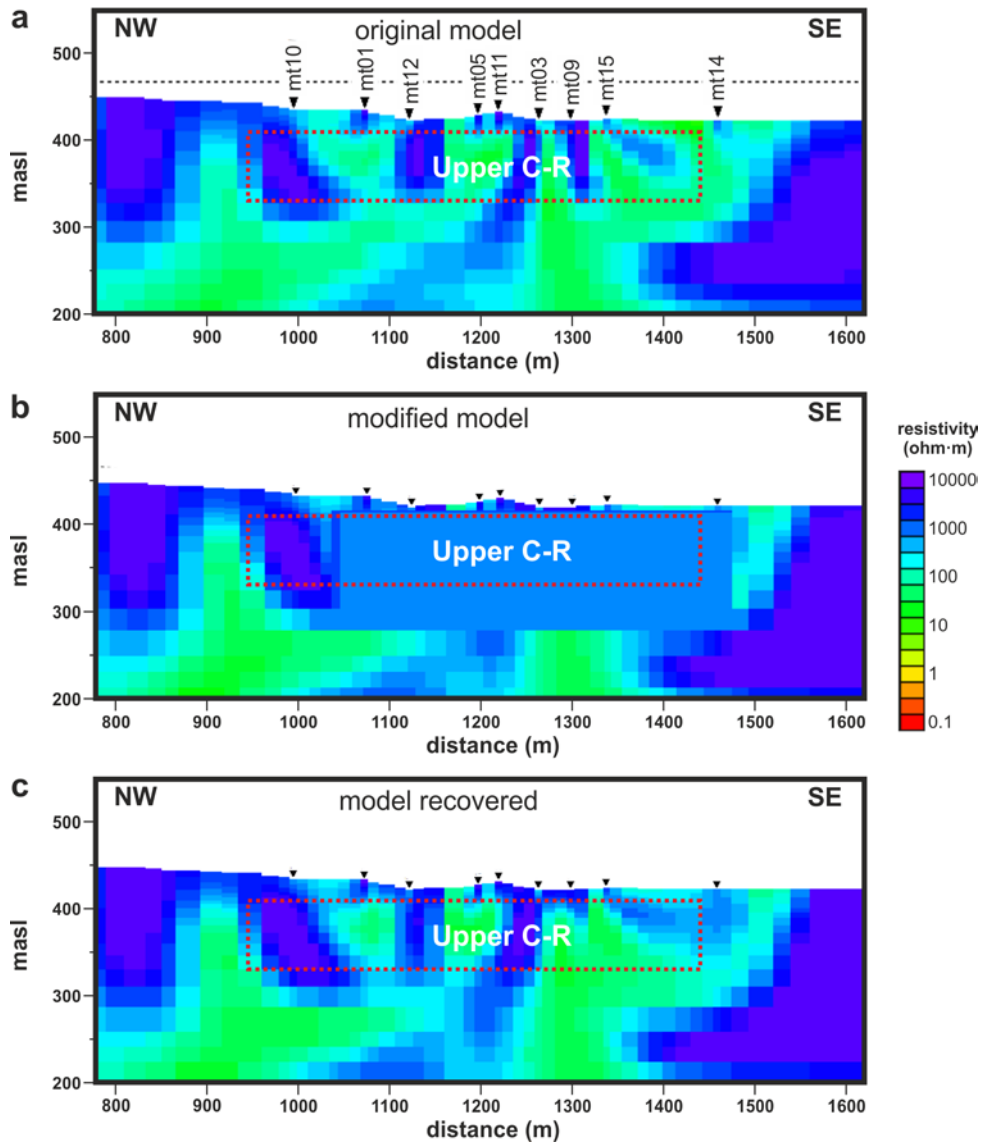

**Figure S2-3:** Portion of the 2D model where the Upper C-R body was tested. a) Original model (rms = 2.9); b) Modified model after replacing the alternation of conductors and resistors with a single resistor (rms = 10.3). c) Model recovered after running a new inversion, which departs from the modified model (rms = 2.9).

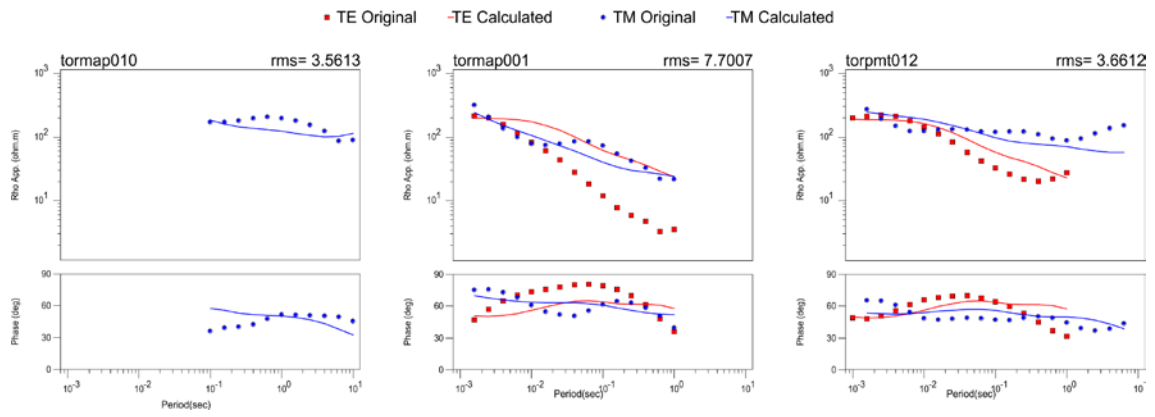

**Figure S2-4:** Data and model responses for the model after replacing Conductor C1 by a body of 200 ohm·m resistivity.
